# Supplementary material for: Hospital-based herpes zoster diagnoses in Denmark: rate, patient characteristics, and all-cause mortality
Source: Springer Nature journal article supplement (doi:10.1186/s12879-016-1369-6), 2016-03-01
Supplement: MOESM1 [file 9740736]

## ADDITIONAL FILE

- Table S1. Registry codes used in the study
- Table S2. Reasons for hospital contact among patients with a secondary herpes zoster diagnosis, Denmark, 1994–2012
- Table S3. Characteristics of 13,663 patients with a first-time hospital-based diagnosis of HZ, Denmark, 1994–2012, by diagnosis types
- Table S4. SMRs among patients with a first-time hospital-based diagnosis of HZ, Denmark, 1994–2012, by diagnosis types
- Figure S1. Rate of first-time hospital-based diagnoses of herpes zoster among men and women, Denmark, 1994–2012, directly standardized to the age-distribution in the 2000 Danish Census
- Figure S2. Age-specific rates of first-time hospital-based diagnoses of herpes zoster, Denmark, 1994–2012
- Figure S3. Age-specific diagnosis rates of herpes zoster reported for European countries

**Table S1. Registry codes used in the study**

|                                                 |                                                                                                                                                                                                                                                                                                                                                                                               |
|-------------------------------------------------|-----------------------------------------------------------------------------------------------------------------------------------------------------------------------------------------------------------------------------------------------------------------------------------------------------------------------------------------------------------------------------------------------|
| <b>Herpes zoster, all diagnoses</b>             | ICD-8: 053.00–053.9; ICD-10: B02.0–B02.9                                                                                                                                                                                                                                                                                                                                                      |
| Complicated                                     | Herpes zoster encephalitis: ICD-10: B02.0<br>Herpes zoster meningitis: ICD-10: B02.1<br>Herpes zoster with other complication of nervous system: ICD-10: B02.2<br>Herpes zoster in eye: ICD-10: B02.3<br>Herpes zoster disseminated: ICD-10: B02.7<br>Herpes zoster with other complication: ICD-10: B02.8                                                                                    |
| Uncomplicated                                   | Herpes zoster without complication: ICD-10: B02.9                                                                                                                                                                                                                                                                                                                                             |
| Localized                                       | Herpes zoster in eye: ICD-10: B02.3<br>Herpes zoster without complication: ICD-10: B02.9                                                                                                                                                                                                                                                                                                      |
| Disseminated                                    | Herpes zoster encephalitis: ICD-10: B02.0<br>Herpes zoster meningitis: ICD-10: B02.1<br>Herpes zoster with other complication of nervous system: ICD-10: B02.2<br>Herpes zoster disseminated: ICD-10: B02.7<br>Herpes zoster with other complication: ICD-10: B02.8                                                                                                                           |
| <b>Stem cell or bone marrow transplantation</b> |                                                                                                                                                                                                                                                                                                                                                                                               |
| Autologous                                      | Treatment codes: BOQE1–BOQE2, BOQF0; ICD-10: Z948C2                                                                                                                                                                                                                                                                                                                                           |
| Allogeneic                                      | Treatment codes: BOQE3–BOQE7, BOQF1–2, BWHA32; ICD-10: Z948C1                                                                                                                                                                                                                                                                                                                                 |
| Autologous or allogeneic stem cell              | If any of the following<br>(1) Treatment codes: BOQE–BOQF if not specified further;<br>(2) Treatment codes: BWHA31;<br>(3) ICD-10: Z948C if not specified further as Z948C1 or Z948C2;<br>(4) ICD-10: Z948 (if not specified further as Z948C, Z948C1, or Z948C2) if coded together with one of the following A–diagnoses C770, C81–C96, D45–D47, D50–D85, D87–D89, T86.0, T86.0A, or T88.8N. |
| <b>Solid organ transplantation</b>              | Danish Classification of Surgical Procedures: 322.09, 322.29, 322.50, 356.09, 472.70, 472.79, 488.40, 488.49, 574.80, 574.90; NOMESCO Classification of Surgical Procedures: FQ, GDG, JLE, JJC, KAS                                                                                                                                                                                           |
| <b>Human immunodeficiency virus infection</b>   | ICD-8: 079.83, Y40.49, Y41.49; ICD-10: B20–B24, F02.4                                                                                                                                                                                                                                                                                                                                         |
| <b>Primary immunodeficiency</b>                 | ICD-10: D80–D84, D89                                                                                                                                                                                                                                                                                                                                                                          |
| <b>Autoimmune diseases</b>                      |                                                                                                                                                                                                                                                                                                                                                                                               |
| <i>Hematological system</i>                     |                                                                                                                                                                                                                                                                                                                                                                                               |
| Autoimmune hemolytic anemia                     | ICD-8: 283.90; ICD-10: D59.0, D59.1                                                                                                                                                                                                                                                                                                                                                           |
| Idiopathic thrombocytopenic purpura             | ICD-8: 287.10; ICD-10: D69.3                                                                                                                                                                                                                                                                                                                                                                  |

---

|                                                       |                                                                                                       |
|-------------------------------------------------------|-------------------------------------------------------------------------------------------------------|
| <i>Endocrine system</i>                               |                                                                                                       |
| Graves' disease                                       | ICD-8: 242.00, 242.01, 242.08, 242.09; ICD-10: E05.0                                                  |
| Autoimmune thyroiditis                                | ICD-8: 244.01, 245.03; ICD-10: E06.3                                                                  |
| Addison's disease                                     | ICD-8: 255.10; ICD-10: E27.1                                                                          |
| Diabetes type I                                       | ICD-8: 249; ICD-10: E10                                                                               |
| <i>Central nervous/ neuromuscular system</i>          |                                                                                                       |
| Multiple sclerosis                                    | ICD-8: 340; ICD-10: G35                                                                               |
| Myasthenia gravis                                     | ICD-8: 733.09; ICD-10: G70.0                                                                          |
| <i>Gastrointestinal/ hepatobiliary system</i>         |                                                                                                       |
| Pernicious anemia                                     | ICD-8: 281.00, 281.01, 281.08, 281.09; ICD-10: D51.0                                                  |
| Coeliac disease                                       | ICD-8: 269.00; ICD-10: K90.0                                                                          |
| Crohn's disease                                       | ICD-8: 563.01, 563.02, 563.09; ICD-10: K50, M07.4                                                     |
| Ulcerative colitis                                    | ICD-8: 563.19, 569.04; ICD-10: K51, M07.5                                                             |
| Primary biliary cirrhosis                             | ICD-8: 571.90; ICD-10: K74.3                                                                          |
| <i>Skin</i>                                           |                                                                                                       |
| Atopic dermatitis                                     | ICD-8: 691.00; ICD-10: L20                                                                            |
| Pemphigus/ pemphigoid                                 | ICD-8: 694.00–694.03, 694.05; ICD-10: L10.0, L10.1, L10.2, L10.4, L12.0                               |
| Dermatitis herpetiformis                              | ICD-8: 693.08, 693.09; ICD-10: L13.0                                                                  |
| Psoriasis                                             | ICD-8: 696.09, 696.10, 696.19; ICD-10: L40, M07.0–M07.3                                               |
| Vitiligo                                              | ICD-8: 709.01; ICD-10: L80                                                                            |
| <i>Connective tissue diseases</i>                     |                                                                                                       |
| Rheumatoid arthritis                                  | ICD-8: 712.19, 712.29, 712.39, 712.59; ICD-10: M05, M06, G73.7D, I32.8A, I39.8E, I41.8A, I52.8A       |
| Juvenile rheumatoid arthritis                         | ICD-8: 712.09; ICD-10: M08                                                                            |
| Ankylosing spondylitis                                | ICD-8: 712.49; ICD-10: M45, H221B                                                                     |
| Polymyositis/ dermatomyositis                         | ICD-8: 716.09, 716.19; ICD-10: M33                                                                    |
| Systemic– and subacute cutaneous lupus erythematosus  | ICD-8: 734.19; ICD-10: M32, G05.8A, G73.7C, I32.8B, I39.8C, L93.1, L93.2, N08.5A, N16.4B              |
| Systemic scleroderma                                  | ICD-8: 734.00–734.09; ICD-10: M34.0–34.9                                                              |
| Mixed connective tissue disease                       | ICD-8: 734.91; ICD-10: M35.1                                                                          |
| Sjögren's syndrome                                    | ICD-8: 734.90; ICD-10: M35.0, G73.7A, N16.4A                                                          |
| Sarcoidosis                                           | ICD-8: 135.99; ICD-10: D86, G53.2, H22.1A, I41.8B, K77.8B, M63.3                                      |
| Vasculitis syndromes including polymyalgia rheumatica | ICD-8: 287.09, 446.09–446.99; ICD-10: D69.0B, I77.6, L95, M30–M31, M35.3, M35.6, M79.3, N08.5B–N08.5E |

---

---

|                                                      |                                            |
|------------------------------------------------------|--------------------------------------------|
| <i>Pulmonary system</i>                              |                                            |
| Idiopathic fibrosing alveolitis (pulmonary fibrosis) | ICD-8: 517.01; ICD-10: J841A, J841B, J841C |
| <i>Ocular diseases</i>                               |                                            |
| Iridocyclitis                                        | ICD-8: 364; ICD-10: H200, H201             |
| <i>Any autoimmune disease</i>                        | If any of the codes listed above           |

---

**Charlson Comorbidity Index**

*Score 1*

|                             |                                                                                                                         |
|-----------------------------|-------------------------------------------------------------------------------------------------------------------------|
| Myocardial infarction       | ICD-8: 410; ICD-10: I21, I22, I23                                                                                       |
| Congestive heart failure    | ICD-8: 427.09, 427.10, 427.11, 427.19, 428.99, 782.49; ICD-10: I50, I11.0, I13.0, I13.2                                 |
| Peripheral vascular disease | ICD-8: 440, 441, 442, 443, 444, 445; ICD-10: I70, I71, I72, I73, I74, I77                                               |
| Cerebrovascular disease     | ICD-8: 430–438; ICD-10: I60–I69, G45, G46                                                                               |
| Dementia                    | ICD-8: 290.09–290.19, 293.09; ICD-10: F00–F03, F05.1, G30                                                               |
| Chronic pulmonary disease   | ICD-8: 490–493, 515–518, ICD-10: J40–J47, J60–J67, J68.4, J70.1, J70.3, J84.1, J92.0, J96.1, J98.2, J98.3               |
| Connective tissue disease   | ICD-8: 712, 716, 734, 446, 135.99; ICD-10: M05, M06, M08, M09, M30, M31, M32, M33, M34, M35, M36, D86                   |
| Ulcer disease               | ICD-8: 530.91, 530.98, 531–534; ICD-10: K22.1, K25–K28                                                                  |
| Mild liver disease          | ICD-8: 571, 573.01, 573.04; ICD-10: B18, K70.0–K70.3, K70.9, K71, K73, K74, K76.0                                       |
| Diabetes type 1 and 2       | ICD-8: 249.00, 249.06, 249.07, 249.09, 250.00, 250.06, 250.07, 250.09; ICD-10: E10.0, E10.1, E10.9, E11.0, E11.1, E11.9 |

*Score 2*

|                                  |                                                                                                                          |
|----------------------------------|--------------------------------------------------------------------------------------------------------------------------|
| Hemiplegia                       | ICD-8: 344; ICD-10: G81, G82                                                                                             |
| Moderate to severe renal disease | ICD-8: 403, 404, 580–583, 584, 590.09, 593.19, 753.10–753.19, 792; ICD-10: 12, I13, N00–N05, N07, N11, N14, N17–N19, Q61 |
| Diabetes with end-organ damage   | ICD-8: 249.01–249.05, 249.08, 250.01–250.05, 250.08; ICD-10: E10.2–E10.8, E11.2–E11.8                                    |
| Any tumor                        | ICD-8: 140–194; ICD-10: C00–C75                                                                                          |
| Leukemia                         | ICD-8: 204–207; ICD-10: C91–C95                                                                                          |
| Lymphoma                         | ICD-8: 200–203, 275.59; ICD-10: C81–C85, C88, C90, C96                                                                   |

*Score 3*

|                                  |                                                                                                                                  |
|----------------------------------|----------------------------------------------------------------------------------------------------------------------------------|
| Moderate to severe liver disease | ICD-8: 070.00, 070.02, 070.04, 070.06, 070.08, 573.00, 456.00–456.09; ICD-10: B15.0, B16.0, B16.2, B19.0, K70.4, K72, K76.6, I85 |
|----------------------------------|----------------------------------------------------------------------------------------------------------------------------------|

*Score 6*

---

|                                                                                                           |                                                                                                                                                                                                                                                                |
|-----------------------------------------------------------------------------------------------------------|----------------------------------------------------------------------------------------------------------------------------------------------------------------------------------------------------------------------------------------------------------------|
| Metastatic solid tumor                                                                                    | ICD-8: 195–198, 199; ICD-10: C76–C80                                                                                                                                                                                                                           |
| Acquired immune deficiency syndrome                                                                       | ICD-8: 079.83; ICD-10: B21–B24                                                                                                                                                                                                                                 |
| <b>Broad grouping of primary diagnoses in patients with secondary herpes zoster diagnosis<sup>a</sup></b> |                                                                                                                                                                                                                                                                |
| Cholera                                                                                                   | ICD-8: 0.0–0.9<br>ICD-10: A00.0–A00.9                                                                                                                                                                                                                          |
| Typhoid and paratyphoid fevers                                                                            | ICD-8: 1.0–1.9<br>ICD-10: A01.0–A01.9                                                                                                                                                                                                                          |
| Other intestinal infectious diseases                                                                      | ICD-8: 5.0–5.9<br>ICD-8: 7.0–7.9<br>ICD-10: A02.0–A02.9<br>ICD-10: A04.0–A05.9<br>ICD-10: A07.0–A08.9                                                                                                                                                          |
| Shigellosis/Bacillary dysentery                                                                           | ICD-8: 4.0–4.9<br>ICD-10: A03.0–A03.9                                                                                                                                                                                                                          |
| Amoebiasis                                                                                                | ICD-8: 6.0–6.9<br>ICD-10: A06.0–A06.9                                                                                                                                                                                                                          |
| Diarrhea and gastro-enteritis of presumed infectious origin                                               | ICD-8: 8.0–9.9<br>ICD-10: A09.0–A09.9                                                                                                                                                                                                                          |
| Respiratory tuberculosis                                                                                  | ICD-8: 10.0–12.3<br>ICD-10: A15.0–A16.9                                                                                                                                                                                                                        |
| Other tuberculosis                                                                                        | ICD-8: 13.0–19.9<br>ICD-10: A17.0–A19.9<br>ICD-10: B90.0–B90.9                                                                                                                                                                                                 |
| Plague                                                                                                    | ICD-8: 20.0–20.9<br>ICD-10: A20.0–A20.9                                                                                                                                                                                                                        |
| Other bacterial diseases                                                                                  | ICD-8: 21.0–22.9<br>ICD-8: 24.0–27.9<br>ICD-8: 31.0–31.9<br>ICD-8: 34.0–34.1<br>ICD-8: 35.0–35.9<br>ICD-8: 30.0–39.9<br>ICD-10: A21.0–A22.9<br>ICD-10: A24.0–A28.9<br>ICD-10: A31.0–A32.9<br>ICD-10: A38.0–A38.9<br>ICD-10: A42.0–A49.9<br>ICD-10: B96.0–B96.9 |
| Brucellosis                                                                                               | ICD-8: 23.0–23.9<br>ICD-10: A23.0–A23.9                                                                                                                                                                                                                        |
| Leprosy                                                                                                   | ICD-8: 30.0–30.9<br>ICD-10: A30.0–A30.9<br>ICD-10: B92.0–B92.9                                                                                                                                                                                                 |
| Tetanus                                                                                                   | ICD-8: 37.0–37.9<br>ICD-10: A33.0–A33.9<br>ICD-10: A34.0–A35.9                                                                                                                                                                                                 |

|                                         |                                                                                                                                                                                                                                                                                                                                  |
|-----------------------------------------|----------------------------------------------------------------------------------------------------------------------------------------------------------------------------------------------------------------------------------------------------------------------------------------------------------------------------------|
| Diphtheria                              | ICD-8: 32.0–32.9<br>ICD-10: A36.0–A36.9                                                                                                                                                                                                                                                                                          |
| Whooping cough                          | ICD-8: 33.0–33.9<br>ICD-10: A37.0–A37.9                                                                                                                                                                                                                                                                                          |
| Meningococcal infection                 | ICD-8: 36.0–36.9<br>ICD-10: A39.0–A39.9                                                                                                                                                                                                                                                                                          |
| Septicemia                              | ICD-8: 38.0–38.9<br>ICD-10: A40.0–A41.9                                                                                                                                                                                                                                                                                          |
| Early syphilis                          | ICD-8: 91.0–91.9<br>ICD-10: A51.0–A51.9                                                                                                                                                                                                                                                                                          |
| Other syphilis                          | ICD-8: 90.0–90.9<br>ICD-8: 92.0–97.9<br>ICD-10: A50.0–A50.9<br>ICD-10: A52.0–A53.9                                                                                                                                                                                                                                               |
| Gonococcal infection                    | ICD-8: 98.0–98.9<br>ICD-10: A54.0–A54.9                                                                                                                                                                                                                                                                                          |
| Other infectious and parasitic diseases | ICD-8: 130.0–136.9<br>ICD-8: 89.0–89.9<br>ICD-8: 99.0–117.9<br>ICD-10: A55.0–A67.9<br>ICD-10: A69.0–A70.9<br>ICD-10: A74.0–A74.9<br>ICD-10: A77.0–A79.9<br>ICD-10: B35.0–B49.9<br>ICD-10: B58.0–B64.9<br>ICD-10: B85.0–B89.9<br>ICD-10: B94.0–B94.9<br>ICD-10: B99.0–B99.9                                                       |
| Relapsing fevers                        | ICD-8: 88.0–88.9<br>ICD-10: A68.0–A68.9                                                                                                                                                                                                                                                                                          |
| Other viral diseases                    | ICD-8: 45.0–46.9<br>ICD-8: 50.0–54.9<br>ICD-8: 57.0–57.9<br>ICD-8: 61.0–61.9<br>ICD-8: 66.0–66.9<br>ICD-8: 68.0–68.9<br>ICD-8: 73.0–79.9<br>ICD-10: A71.0–A71.9<br>ICD-10: A81.0–A81.9<br>ICD-10: A87.0–A89.9<br>ICD-10: B00.0–B04.9<br>ICD-10: B07.0–B09.9<br>ICD-10: B20.0–B25.9<br>ICD-10: B27.0–B34.9<br>ICD-10: B97.0–B97.9 |
| Typhus and other rickettsioses          | ICD-8: 80.0–83.9<br>ICD-10: A75.0–A75.9                                                                                                                                                                                                                                                                                          |
| Acute poliomyelitis                     | ICD-8: 40.0–44.9<br>ICD-10: A80.0–A80.9                                                                                                                                                                                                                                                                                          |

|                                                                 |                                                                                                                                     |
|-----------------------------------------------------------------|-------------------------------------------------------------------------------------------------------------------------------------|
|                                                                 | ICD-10: B91.0–B91.9                                                                                                                 |
| Rabies                                                          | ICD-8: 71.0–71.9<br>ICD-10: A82.0–A82.9                                                                                             |
| Viral encephalitis                                              | ICD-8: 62.0–65.9<br>ICD-10: A83.0–A86.9                                                                                             |
| Other arthropod-borne viral fevers and viral hemorrhagic fevers | ICD-8: 67.0–67.9<br>ICD-10: A90.0–A94.9<br>ICD-10: A96.0–A99.9                                                                      |
| Yellow fever                                                    | ICD-8: 60.0–60.9<br>ICD-10: A95.0–A95.9                                                                                             |
| Measles                                                         | ICD-8: 55.0–55.9<br>ICD-10: B05.0–B05.9                                                                                             |
| Rubella                                                         | ICD-8: 56.0–56.9<br>ICD-10: B06.0–B06.9                                                                                             |
| Hepatitis                                                       | ICD-8: 70.0–70.9<br>ICD-10: B15.0–B15.9<br>ICD-10: B16.0–B16.9<br>ICD-10: B17.0–B19.9                                               |
| Mumps                                                           | ICD-8: 72.0–72.9<br>ICD-10: B26.0–B26.9                                                                                             |
| Malaria                                                         | ICD-8: 84.0–84.9<br>ICD-10: B50.0–B54.9                                                                                             |
| Leishmaniasis                                                   | ICD-8: 85.0–85.9<br>ICD-10: B55.0–B55.9                                                                                             |
| Trypanosomiasis                                                 | ICD-8: 86.0–87.9<br>ICD-10: B56.0–B57.9                                                                                             |
| Schistosomiasis                                                 | ICD-8: 120.0–120.9<br>ICD-10: B65.0–B65.9                                                                                           |
| Other helminthiase                                              | ICD-8: 121.0–121.9<br>ICD-8: 123.0–125.9<br>ICD-8: 127.0–129.9<br>ICD-10: B66.0–B66.9<br>ICD-10: B68.0–B75.9<br>ICD-10: B77.0–B83.9 |
| Echinococcosis/hydatidosis                                      | ICD-8: 122.0–122.9<br>ICD-10: B67.0–B67.9                                                                                           |
| Hookworm diseases/Ankylostomiasis                               | ICD-8: 126–126.9<br>ICD-10: B76.0–B76.9                                                                                             |
| Malignant neoplasm of lip, oral cavity and pharynx              | ICD-8: 140.0–149.9<br>ICD-10: C00.0–C14.9                                                                                           |
| Malignant neoplasm of other digestive organs and peritoneum     | ICD-8: 150.0–150.9<br>ICD-8: 155.0–159.9<br>ICD-10: C15.0–C15.9<br>ICD-10: C17.0–C17.9<br>ICD-10: C22.0–C26.9                       |

|                                                                           |                                                                                                                                     |
|---------------------------------------------------------------------------|-------------------------------------------------------------------------------------------------------------------------------------|
| Malignant neoplasm of stomach                                             | ICD-8: 151.0–151.9<br>ICD-10: C16.0–C16.9                                                                                           |
| Malignant neoplasm of colon                                               | ICD-8: 152.0–153.9<br>ICD-10: C18.0–C18.9                                                                                           |
| Malignant neoplasm of rectosigmoid junction, rectum, anus, and anal canal | ICD-8: 154.0–154.9<br>ICD-10: C19.0–C21.9                                                                                           |
| Other malignant neoplasms of respiratory and intrathoracic organs         | ICD-10: C30.0–C31.9<br>ICD-10: C37.0–C39.9                                                                                          |
| Malignant neoplasm of other and unspecified respiratory organs            | ICD-8: 160.0–160.9<br>ICD-8: 163.0–163.9                                                                                            |
| Malignant neoplasm of larynx                                              | ICD-8: 161.0–161.9<br>ICD-10: C32.0–C32.9                                                                                           |
| Malignant neoplasm of trachea, bronchus and lung                          | ICD-8: 162.0–162.9<br>ICD-10: C33.0–C34.9                                                                                           |
| Malignant neoplasm of bone and articular cartilage                        | ICD-8: 170.0–170.9<br>ICD-10: C40.0–C41.9                                                                                           |
| Malignant neoplasm of skin                                                | ICD-8: 172.0–173.9<br>ICD-10: C43.0–C43.9<br>ICD-10: C44.0–C44.9                                                                    |
| Malignant neoplasm of other specified sites                               | ICD-8: 171.0–171.9<br>ICD-8: 190.0–190.9<br>ICD-8: 192.0–195.9<br>ICD-10: C45.0–C49.9<br>ICD-10: C69.0–C70.9<br>ICD-10: C72.0–C72.9 |
| Malignant neoplasm of breast                                              | ICD-8: 174.0–174.9<br>ICD-10: C50.0–C50.9                                                                                           |
| Other malignant neoplasms of female genital organs                        | ICD-8: 181.0–181.9<br>ICD-8: 183.0–183.1<br>ICD-8: 183.0–184.9<br>ICD-10: C51.0–C52.9<br>ICD-10: C56.0–C58.9                        |
| Malignant neoplasm of <i>cervix uteri</i>                                 | ICD-8: 180.0–180.9<br>ICD-10: C53.0–C53.9                                                                                           |
| Malignant neoplasm of other and unspecified parts of uterus               | ICD-8: 182.0–182.9<br>ICD-10: C54.0–C55.9                                                                                           |
| Other malignant neoplasms of male genital organs                          | ICD-8: 186.0–186.9<br>ICD-10: C60.0–C60.9<br>ICD-10: C62.0–C63.9                                                                    |
| Malignant neoplasm of prostate                                            | ICD-8: 185.0–185.9<br>ICD-10: C61.0–C61.9                                                                                           |
| Other malignant neoplasms of urinary tract                                | ICD-10: C64.0–C66.9<br>ICD-10: C68.0–C68.9                                                                                          |
| Malignant neoplasm of other genitourinary                                 | ICD-8: 187.0–187.9                                                                                                                  |



|                                                                                           |                                                                                                                                                                                                                                                                                                                         |
|-------------------------------------------------------------------------------------------|-------------------------------------------------------------------------------------------------------------------------------------------------------------------------------------------------------------------------------------------------------------------------------------------------------------------------|
| organs                                                                                    | ICD-8: 189.0–189.9                                                                                                                                                                                                                                                                                                      |
| Malignant neoplasm of bladder                                                             | ICD-8: 188.0–188.9<br>ICD-10: C67.0–C67.9                                                                                                                                                                                                                                                                               |
| Malignant neoplasm of brain                                                               | ICD-8: 191.0–191.9<br>ICD-10: C71.0–C71.9                                                                                                                                                                                                                                                                               |
| Malignant neoplasm of other, ill-defined, secondary, unspecified, and multiple sites      | ICD-8: 197.0–199.9<br>ICD-10: C73.0–C80.<br>ICD-10: C97.0–C97.9                                                                                                                                                                                                                                                         |
| Hodgkin’s disease                                                                         | ICD-8: 201.0–201.9<br>ICD-10: C81.0–C81.9                                                                                                                                                                                                                                                                               |
| Other malignant neoplasms of lymphoid, hematopoietic, and related tissue                  | ICD-8: 196.0–196.9<br>ICD-8: 200.0–200.9<br>ICD-8: 202.0–203.9<br>ICD-8: 208.0–209.9<br>ICD-10: C82.0–C85.9<br>ICD-10: C88.0–C90.9<br>ICD-10: C96.0–C96.9                                                                                                                                                               |
| Leukemia                                                                                  | ICD-8: 204.0–207.9<br>ICD-10: C91.0–C95.9                                                                                                                                                                                                                                                                               |
| Other <i>in situ</i> and benign neoplasms and neoplasms of uncertain and unknown behavior | ICD-8: 210.0–215.9<br>ICD-8: 217.0–217.9<br>ICD-8: 219.0–219.9<br>ICD-8: 221.0–222.9<br>ICD-8: 224.0–224.9<br>ICD-8: 226.0–228.9<br>ICD-8: 230.0–239.9<br>ICD-10: D00.0–D05.9<br>ICD-10: D07.0–D21.9<br>ICD-10: D24.0–D24.9<br>ICD-10: D26.0–D26.9<br>ICD-10: D28.0–D29.9<br>ICD-10: D31.0–D32.9<br>ICD-10: D34.0–D48.9 |
| Carcinoma <i>in situ</i> of cervix uteri                                                  | ICD-8: 234.0–234.0<br>ICD-10: D06.0–D06.9                                                                                                                                                                                                                                                                               |
| Benign neoplasm of skin                                                                   | ICD-8: 216.0–216.9<br>ICD-10: D22.0–D23.9                                                                                                                                                                                                                                                                               |
| Leiomyoma of uterus                                                                       | ICD-8: 218.0–218.9<br>ICD-10: D25.0–D25.9                                                                                                                                                                                                                                                                               |
| Benign neoplasm of ovary                                                                  | ICD-8: 220.0–220.9<br>ICD-10: D27.0–D27.9                                                                                                                                                                                                                                                                               |
| Benign neoplasm of kidney and other urinary organs                                        | ICD-8: 223.0–223.9<br>ICD-10: D30.0–D30.9                                                                                                                                                                                                                                                                               |
| Benign neoplasm of brain and other parts of central nervous system                        | ICD-8: 225.0–225.9<br>ICD-10: D33.0–D33.9                                                                                                                                                                                                                                                                               |
| Iron deficiency anemia                                                                    | ICD-8: 280.0–280.9<br>ICD-10: D50.0–D50.9                                                                                                                                                                                                                                                                               |

|                                                                             |                                                                                                                                                                                                           |
|-----------------------------------------------------------------------------|-----------------------------------------------------------------------------------------------------------------------------------------------------------------------------------------------------------|
| Other anemia                                                                | ICD-8: 281.0–285.9<br>ICD-10: D51.0–D64.9                                                                                                                                                                 |
| Hemorrhagic conditions and other diseases of blood and blood-forming organs | ICD-8: 286.0–289.9<br>ICD-10: D65.0–D77.9                                                                                                                                                                 |
| Other endocrine, nutritional, and metabolic disorders                       | ICD-8: 251.0–258.9<br>ICD-8: 270.0–279.9<br>ICD-10: D80.0–D89.9<br>ICD-10: E15.0–E35.9<br>ICD-10: E58.0–E63.9<br>ICD-10: E65.0–E65.9<br>ICD-10: E66.0–E66.9<br>ICD-10: E67.0–E85.9<br>ICD-10: E87.0–E90.9 |
| Other disorders of thyroid                                                  | ICD-8: 240.0–241.9<br>ICD-8: 243.0–246.9<br>ICD-10: E03.0–E04.9<br>ICD-10: E06.0–E07.9                                                                                                                    |
| Iodine-deficiency-related thyroid disorders                                 | ICD-8: 242.0–242.9<br>ICD-10: E00.0–E02.9<br>ICD-10: E05.0–E05.9                                                                                                                                          |
| Diabetes mellitus                                                           | ICD-8: 249.0–250.9<br>ICD-10: E10.0–E14.9                                                                                                                                                                 |
| A-vitaminosis and other nutritional deficiency                              | ICD-8: 260.0–269.9<br>ICD-10: E40.0–E47.9<br>ICD-10: E50.0–E50.9<br>ICD-10: E51.0–E56.9<br>ICD-10: E64.0–E64.9                                                                                            |
| Dementia                                                                    | ICD-8: 290.0–290.0<br>ICD-8: 290.0–290.9<br>ICD-10: F00.0–F03.9<br>ICD-10: G31.0–G31.0                                                                                                                    |
| Other mental and behavioral disorders                                       | ICD-8: 292.0–294.9<br>ICD-8: 297.0–299.9<br>ICD-8: 305.0–309.9<br>ICD-10: F04.0–F09.9<br>ICD-10: F50.0–F69.9<br>ICD-10: F80.0–F99.9                                                                       |
| Alcohol-, drug-abuse-related disease                                        | ICD-8: 291.0–291.9<br>ICD-8: 303.0–304.9<br>ICD-10: F10.0–F19.9                                                                                                                                           |
| Schizophrenia, schizotypal, and delusional disorders                        | ICD-8: 295.0–295.9<br>ICD-10: F20.0–F29.9                                                                                                                                                                 |
| Mood (affective) disorders                                                  | ICD-8: 296.0–296.1<br>ICD-8: 296.0–296.9<br>ICD-10: F30.0–F31.9<br>ICD-10: F34.0–F39.9                                                                                                                    |
| Depression                                                                  | ICD-8: 296.0–296.0<br>ICD-8: 296.0–296.2                                                                                                                                                                  |

|                                                           |                                                                                                                                                                                                                                                                               |
|-----------------------------------------------------------|-------------------------------------------------------------------------------------------------------------------------------------------------------------------------------------------------------------------------------------------------------------------------------|
|                                                           | ICD-10: F32.0–F33.9                                                                                                                                                                                                                                                           |
| Neurotic, stress-related, and somatoform disorders        | ICD-8: 300.0–302.9<br>ICD-10: F40.0–F48.9                                                                                                                                                                                                                                     |
| Mental retardation                                        | ICD-8: 310.0–315.9<br>ICD-10: F70.0–F79.9                                                                                                                                                                                                                                     |
| Inflammatory diseases of the central nervous system       | ICD-8: 320.0–320.9<br>ICD-8: 321.0–324.9<br>ICD-10: G00.0–G09.9                                                                                                                                                                                                               |
| Other diseases of the nervous system                      | ICD-8: 330.0–333.9<br>ICD-8: 343.0–344.9<br>ICD-8: 347.0–358.9<br>ICD-10: G10.0–G13.9<br>ICD-10: G21.0–G26.9<br>ICD-10: G31.1–G32.9<br>ICD-10: G36.0–G37.9<br>ICD-10: G44.0–G44.9<br>ICD-10: G46.0–G47.9<br>ICD-10: G50.0–G73.9<br>ICD-10: G80.0–G83.9<br>ICD-10: G90.0–G99.9 |
| Parkinson’s disease                                       | ICD-8: 342.0–342.9<br>ICD-10: G20.0–G20.9                                                                                                                                                                                                                                     |
| Alzheimer’s disease                                       | ICD-8: 290.0–290.1<br>ICD-10: G30.0–G30.9                                                                                                                                                                                                                                     |
| Multiple sclerosis and other demyelinating diseases       | ICD-8: 340.0–341.9<br>ICD-10: G35.0–G35.9                                                                                                                                                                                                                                     |
| Epilepsy                                                  | ICD-8: 345.0–345.9<br>ICD-10: G40.0–G41.9                                                                                                                                                                                                                                     |
| Migraine                                                  | ICD-8: 346.0–346.9<br>ICD-10: G43.0–G43.9                                                                                                                                                                                                                                     |
| Transient cerebral ischemic attacks and related syndromes | ICD-8: 435.0–435.9<br>ICD-10: G45.0–G45.9                                                                                                                                                                                                                                     |
| Other inflammatory diseases of eye                        | ICD-8: 360.0–369.9<br>ICD-10: H00.0–H01.9<br>ICD-10: H10.0–H13.9<br>ICD-10: H15.0–H19.9                                                                                                                                                                                       |
| Other diseases of the eye and adnexa                      | ICD-8: 370.0–372.9<br>ICD-8: 377.0–379.9<br>ICD-10: H02.0–H06.9<br>ICD-10: H20.0–H22.9<br>ICD-10: H30.0–H32.9<br>ICD-10: H34.0–H36.9<br>ICD-10: H43.0–H48.9<br>ICD-10: H51.0–H59.9                                                                                            |
| Cataract and other disorders of lens                      | ICD-8: 374.0–374.9<br>ICD-10: H25.0–H28.9                                                                                                                                                                                                                                     |
| Retinal detachments and breaks                            | ICD-8: 376.0–376.9                                                                                                                                                                                                                                                            |

|                                               |                                                                                                                                                                                  |
|-----------------------------------------------|----------------------------------------------------------------------------------------------------------------------------------------------------------------------------------|
|                                               | ICD-10: H33.0–H33.9                                                                                                                                                              |
| Glaucoma                                      | ICD-8: 375.0–375.9<br>ICD-10: H40.0–H42.9                                                                                                                                        |
| Strabismus                                    | ICD-8: 373.0–373.9<br>ICD-10: H49.0–H50.9                                                                                                                                        |
| Other diseases of the ear and mastoid process | ICD-8: 380.0–380.9<br>ICD-8: 381.0–381.9<br>ICD-8: 382.0–383.9<br>ICD-8: 384.0–389.9<br>ICD-10: H60.0–H62.9<br>ICD-10: H65.0–H75.9<br>ICD-10: H80.0–H83.9<br>ICD-10: H90.0–H95.9 |
| Acute rheumatic fever                         | ICD-8: 390.0–392.9<br>ICD-10: I00.0–I02.9                                                                                                                                        |
| Chronic rheumatic heart disease               | ICD-8: 393.0–392.2<br>ICD-10: I05.0–I09.9                                                                                                                                        |
| Essential (primary) hypertension              | ICD-8: 400.0–404.9<br>ICD-10: I10.0–I15.9                                                                                                                                        |
| Angina pectoris                               | ICD-8: 413.0–413.9<br>ICD-10: I20.0–I20.9                                                                                                                                        |
| Acute myocardial infarction                   | ICD-8: 410.0–410.9<br>ICD-10: I21.0–I22.9                                                                                                                                        |
| Other ischemic heart diseases                 | ICD-8: 411.0–412.9<br>ICD-10: I23.0–I25.9                                                                                                                                        |
| Other ischemic heart disease                  | ICD-8: 414.0–414.9                                                                                                                                                               |
| Pulmonary embolism                            | ICD-8: 450.0–450.9<br>ICD-10: I26.0–I26.9                                                                                                                                        |
| Other heart diseases                          | ICD-8: 420.0–426.9<br>ICD-8: 428.0–429.9<br>ICD-10: I27.0–I43.9<br>ICD-10: I51.0–I52.9                                                                                           |
| Conduction disorders and cardiac arrhythmias  | ICD-8: 427.0–427.9<br>ICD-10: I44.0–I49.9                                                                                                                                        |
| Congestive heart failure                      | ICD-8: 427.0–427.0<br>ICD-10: I50.0–I50.9                                                                                                                                        |
| Intracranial hemorrhage                       | ICD-8: 431.0–431.9<br>ICD-10: I60.0–I62.9                                                                                                                                        |
| Cerebral infarction                           | ICD-8: 432.0–434.9<br>ICD-10: I63.0–I63.9                                                                                                                                        |
| Other cerebrovascular diseases                | ICD-8: 430.0–430.9<br>ICD-8: 436.0–436.9<br>ICD-8: 437.0–438.9<br>ICD-10: I64.0–I64.9<br>ICD-10: I65.0–I69.9                                                                     |

|                                                             |                                                                                                                                     |
|-------------------------------------------------------------|-------------------------------------------------------------------------------------------------------------------------------------|
| Atherosclerosis                                             | ICD-8: 440.0–440.9<br>ICD-10: I70.0–I70.9                                                                                           |
| Other diseases of arteries, arterioles and capillaries      | ICD-8: 441.0–442.9<br>ICD-8: 444.0–448.9<br>ICD-10: I71.0–I72.9<br>ICD-10: I74.0–I74.9<br>ICD-10: I77.0–I79.9                       |
| Other peripheral vascular diseases                          | ICD-8: 443.0–443.9<br>ICD-10: I73.0–I73.9                                                                                           |
| Phlebitis, thrombophlebitis, venous embolism and thrombosis | ICD-8: 451.0–453.9<br>ICD-10: I80.0–I82.9                                                                                           |
| Varicose veins of lower extremities                         | ICD-8: 454.0–454.9<br>ICD-10: I83.0–I83.9                                                                                           |
| Hemorrhoids                                                 | ICD-8: 455.0–455.9<br>ICD-10: I84.0–I84.9                                                                                           |
| Other diseases of the circulatory system                    | ICD-8: 456.0–458.9<br>ICD-10: I85.0–I99.9                                                                                           |
| Other acute upper respiratory infections                    | ICD-8: 460–461.9<br>ICD-8: 464.0–465.9<br>ICD-10: J00.0–J01.9<br>ICD-10: J04.0–J04.9<br>ICD-10: J05.0–J06.9                         |
| Acute pharyngitis and acute tonsillitis                     | ICD-8: 34.0–34.0<br>ICD-8: 462.0–463.9<br>ICD-10: J02.0–J03.9                                                                       |
| Influenza                                                   | ICD-8: 470.0–474.9<br>ICD-10: J10.0–J11.9                                                                                           |
| Pneumonia                                                   | ICD-8: 480.0–480.9<br>ICD-8: 481.0–481.9<br>ICD-8: 482.0–483.9<br>ICD-8: 484.0–486.9<br>ICD-10: J12.0–J18.9                         |
| Acute bronchitis and acute bronchiolitis                    | ICD-8: 466.0–466.9<br>ICD-10: J20.0–J21.9                                                                                           |
| Other diseases of the respiratory system                    | ICD-8: 510.0–514.9<br>ICD-8: 517.0–517.9<br>ICD-8: 519.0–519.9<br>ICD-10: J22.0–J22.9<br>ICD-10: J66.0–J99.9                        |
| Other diseases of upper respiratory tract                   | ICD-8: 501.0–502.9<br>ICD-8: 504.0–504.9<br>ICD-8: 505.0–508.9<br>ICD-10: J30.0–J31.9<br>ICD-10: J33.0–J34.9<br>ICD-10: J36.0–J39.9 |
| Chronic sinusitis                                           | ICD-8: 503.0–503.9<br>ICD-10: J32.0–J32.9                                                                                           |

|                                                                    |                                                                                                                                      |
|--------------------------------------------------------------------|--------------------------------------------------------------------------------------------------------------------------------------|
| Chronic disease of tonsils and adenoids                            | ICD-8: 500.0–500.9<br>ICD-10: J35.0–J35.9                                                                                            |
| Bronchitis, emphysema and other chronic pulmonary diseases         | ICD-8: 490.0–493.9<br>ICD-10: J40.0–J44.9<br>ICD-10: J45.0–J46.9                                                                     |
| Bronchiectasis                                                     | ICD-8: 518.0–518.9<br>ICD-10: J47.0–J47.9                                                                                            |
| Pneumoconioses and related diseases                                | ICD-8: 515.0–516.9<br>ICD-10: J60.0–J65.9                                                                                            |
| Other diseases of the teeth, oral cavity, salivary glands and jaws | ICD-8: 520.0–529.9<br>ICD-10: K00.0–K14.9                                                                                            |
| Other diseases of esophagus, stomach and duodenum                  | ICD-8: 530.0–530.9<br>iCD-8: 536.0–537.9<br>ICD-10: K20.0–K23.9<br>ICD-10: K28.0–K28.9<br>ICD-10: K30.0–K31.9                        |
| Gastric and duodenal ulcer                                         | ICD-8: 531.0–534.9<br>ICD-10: K25.0–K27.9                                                                                            |
| Gastritis and duodenitis                                           | ICD-8: 535.0–535.9<br>ICD-10: K29.0–K29.9                                                                                            |
| Diseases of appendix                                               | ICD-8: 540.0–543.9<br>ICD-10: K35.0–K38.9                                                                                            |
| Hernia                                                             | ICD-8: 550.0–553.9<br>ICD-10: K40.0–K46.9                                                                                            |
| Crohn's disease and ulcerative colitis                             | ICD-8: 563.0–563.9<br>ICD-10: K50.0–K51.9                                                                                            |
| Other diseases of the digestive system                             | ICD-8: 561.0–562.9<br>ICD-8: 564.0–569.9<br>ICD-10: K52.0–K55.9<br>ICD-10: K57.0–K67.9<br>ICD-10: K82.0–K83.9<br>ICD-10: K87.0–K93.9 |
| Paralytic ileus and intestinal obstruction without hernia          | ICD-8: 560.0–560.9<br>ICD-10: K56.0–K56.9                                                                                            |
| Other diseases of liver and gallbladder                            | ICD-8: 570.0–573.9<br>ICD-8: 576.0–576.9<br>ICD-10: K70.0–K77.9                                                                      |
| Cholelithiasis and cholecystitis                                   | ICD-8: 574.0–575.9<br>ICD-10: K80.0–K81.9                                                                                            |
| Acute pancreatitis and other diseases of the pancreas              | ICD-8: 577.0–577.9<br>ICD-10: K85.0–K86.9                                                                                            |
| Infections of the skin and subcutaneous tissue                     | ICD-8: 680.0–686.9<br>ICD-10: L00.0–L08.9                                                                                            |
| Other diseases of the skin and subcutaneous tissue                 | ICD-8: 690.0–698.9<br>ICD-8: 700.0–709.9                                                                                             |

|                                                                    |                                                                                                                                                              |
|--------------------------------------------------------------------|--------------------------------------------------------------------------------------------------------------------------------------------------------------|
|                                                                    | ICD-10: L10.0–L99.9                                                                                                                                          |
| Other disorders of joints                                          | ICD-8: 724.0–724.9<br>ICD-8: 726.0–727.9<br>ICD-8: 729.0–729.9<br>ICD-8: 737.0–737.9<br>ICD-10: M00.0–M03.9<br>ICD-10: M22.0–M25.9                           |
| Rheumatoid arthritis and other inflammatory polyarthropathies      | ICD-8: 712.0–712.9<br>ICD-8: 716.0–716.9<br>ICD-10: M05.0–M14.9                                                                                              |
| Osteoarthritis and allied conditions                               | ICD-8: 710.0–711.9<br>ICD-8: 713.0–715.9<br>ICD-10: M15.0–M19.9<br>ICD-10: M47.0–M47.9<br>ICD-10: M48.3–M48.3                                                |
| Acquired deformities of limbs                                      | ICD-8: 736.0–736.9<br>ICD-10: M20.0–M21.9                                                                                                                    |
| Other diseases of the musculoskeletal system and connective tissue | ICD-8: 730.0–730.9<br>ICD-8: 733.0–734.9<br>ICD-8: 738.0–738.9<br>ICD-10: M30.0–M36.9<br>ICD-10: M87.0–M90.9<br>ICD-10: M94.0–M99.9                          |
| Other dorsopathies                                                 | ICD-8: 735.0–735.9<br>ICD-10: M40.0–M41.9<br>ICD-10: M43.0–M43.5<br>ICD-10: M43.7–M46.9<br>ICD-10: M48.0–M48.2<br>ICD-10: M48.4–M49.9<br>ICD-10: M53.0–M53.9 |
| Osteochondrosis                                                    | ICD-8: 722.0–722.9<br>ICD-10: M42.0–M42.9<br>ICD-10: M91.0–M93.9                                                                                             |
| Rheumatism                                                         | ICD-8: 717.0–718.9<br>ICD-10: M43.6–M43.6<br>ICD-10: M79.0–M79.1                                                                                             |
| Cervical and other intervertebral disc disorders                   | ICD-8: 725.0–725.9<br>ICD-8: 728.0–728.9<br>ICD-10: M50.0–M51.9<br>ICD-10: M54.0–M54.9                                                                       |
| Myositis                                                           | ICD-8: 732.0–732.9<br>ICD-10: M60.0–M60.9                                                                                                                    |
| Soft tissue disorders                                              | ICD-8: 731.0–731.9<br>ICD-10: M61.0–M78.9<br>ICD-10: M79.2–M79.5<br>ICD-10: M79.7–M79.9                                                                      |
| Osteoporosis with and without fracture                             | ICD-8: 723.0–723.0<br>ICD-10: M80.0–M81.9                                                                                                                    |

|                                                     |                                                                                                                                     |
|-----------------------------------------------------|-------------------------------------------------------------------------------------------------------------------------------------|
| Other diseases of bone                              | ICD-8: 721.0–721.9<br>ICD-8: 723.0–723.9<br>ICD-10: M82.0–M85.9                                                                     |
| Osteomyelitis and periostitis                       | ICD-8: 720.0–720.9<br>ICD-10: M86.0–M86.9                                                                                           |
| Nephritis and nephrosis                             | ICD-8: 580.0–584.9<br>ICD-10: N00.0–N08.9                                                                                           |
| Infections of kidney                                | ICD-8: 590.0–590.9<br>ICD-10: N10.0–N16.9                                                                                           |
| Other diseases of the urinary system                | ICD-8: 591.0–591.9<br>ICD-8: 593.0–593.9<br>ICD-8: 596.0–599.9<br>ICD-10: N17.0–N19.9<br>ICD-10: N25.0–N29.9<br>ICD-10: N31.0–N39.9 |
| Urolithiasis/Calculus of urinary system             | ICD-8: 592.0–592.9<br>ICD-8: 594.0–594.9<br>ICD-10: N20.0–N23.9                                                                     |
| Cystitis                                            | ICD-8: 595.0–595.9<br>ICD-10: N30.0–N30.9                                                                                           |
| Hyperplasia of prostate                             | ICD-8: 600.0–600.9<br>ICD-10: N40.0–N40.9                                                                                           |
| Other diseases of male genital organs               | ICD-8: 601.0–602.9<br>ICD-8: 604.0–604.9<br>ICD-8: 606.0–607.9<br>ICD-10: N41.0–N42.9<br>ICD-10: N44.0–N46.9<br>ICD-10: N48.0–N51.9 |
| Hydrocele and spermatocele                          | ICD-8: 603.0–603.9<br>ICD-10: N43.0–N43.9                                                                                           |
| Redundant prepuce, phimosis and paraphimosis        | ICD-8: 605.0–605.9<br>ICD-10: N47.0–N47.9                                                                                           |
| Disorders of breast                                 | ICD-8: 610.0–611.9<br>ICD-10: N60.0–N64.9                                                                                           |
| Salpingitis and oophoritis                          | ICD-8: 612.0–614.9<br>ICD-10: N70.0–N70.9                                                                                           |
| Other inflammatory diseases of female pelvic organs | ICD-8: 622.0–622.9<br>ICD-10: N71.0–N71.9<br>ICD-10: N73.0–N77.9                                                                    |
| Inflammatory disease of cervix uteri                | ICD-8: 620.0–620.9<br>ICD-10: N72.0–N72.9                                                                                           |
| Endometriosis                                       | ICD-8: 625.0–625.3<br>ICD-10: N80.0–N80.9                                                                                           |
| Female genital prolapse                             | ICD-8: 623.0–623.9<br>ICD-10: N81.0–N81.9                                                                                           |



|                                                         |                                                                                                                                                                                 |
|---------------------------------------------------------|---------------------------------------------------------------------------------------------------------------------------------------------------------------------------------|
| Other disorders of genitourinary tract                  | ICD-8:621.0–621.9<br>ICD-8: 624.0–625.9<br>ICD-8: 627.0–627.9<br>ICD-8: 629.0–629.9<br>ICD-10: N82.0–N82.9<br>ICD-10: N84.0–N90.9<br>ICD-10: N93.0–N96.9<br>ICD-10: N98.0–N99.9 |
| Other diseases of ovary, fallopian tube and parametrium | ICD-8: 615.0–616.9<br>ICD-10: N83.0–N83.9                                                                                                                                       |
| Disorders of menstruation                               | ICD-8: 626.0–626.9<br>ICD-10: N91.0–N92.9                                                                                                                                       |
| Female infertility                                      | ICD-8: 628.0–628.9<br>ICD-10: N97.0–N97.9                                                                                                                                       |
| Ectopic pregnancy                                       | ICD-8: 631.0–631.9<br>ICD-10: O00.0–O00.9                                                                                                                                       |
| Pregnancies with abortive outcome                       | ICD-8: 640.0–645.9<br>ICD-10: O01.0–O08.9                                                                                                                                       |
| Other complications of pregnancy or delivery            | ICD-8: 630.0–639.9<br>ICD-8: 651.0–666.9<br>ICD-8: 670.0–678.9<br>ICD-10: O10.0–O16.9<br>ICD-10: O20.0–O48.9<br>ICD-10: O60.0–O75.9<br>ICD-10: O81.0–O99.9                      |
| Delivery without mention of complication                | ICD-8: 650.0–650.9<br>ICD-10: O80.0–O80.9                                                                                                                                       |
| Conditions originating in the perinatal period          | ICD-8: 760.0–773.9<br>ICD-8: 776.0–779.9<br>ICD-10: P00.0–P54.9<br>ICD-10: P56.0–P96.9                                                                                          |
| Hemolytic disease of fetus and newborn                  | ICD-8: 774.0–775.9<br>ICD-10: P55.0–P55.9                                                                                                                                       |
| Spina bifida and congenital hydrocephalus               | ICD-8: 741.0–742.9<br>ICD-10: Q05.0–Q05.9                                                                                                                                       |
| Congenital malformations of the circulatory system      | ICD-8: 746.0–747.9<br>ICD-10: Q20.0–Q28.9                                                                                                                                       |
| Cleft lip and cleft palate                              | ICD-8: 749.0–749.9<br>ICD-10: Q35.0–Q37.9                                                                                                                                       |
| Other congenital malformations of the digestive system  | ICD-8: 750.0–750.0<br>ICD-8: 750.0–750.9<br>ICD-8: 751.0–751.9<br>ICD-10: Q38.0–Q40.9<br>ICD-10: Q42.0–Q45.9                                                                    |
| Absence, atresia and stenosis of small intestine        | ICD-8: 750.0–750.1<br>ICD-10: Q41.0–Q41.9                                                                                                                                       |

|                                                                                                                                                                |                                                                                                                                                                                                     |
|----------------------------------------------------------------------------------------------------------------------------------------------------------------|-----------------------------------------------------------------------------------------------------------------------------------------------------------------------------------------------------|
| Other malformations of the genitourinary system                                                                                                                | ICD-8: 752.2–753.9<br>ICD-10: Q50.0–Q52.9<br>ICD-10: Q54.0–Q64.9                                                                                                                                    |
| Undescended testicle                                                                                                                                           | ICD-8: 752.0–752.1<br>ICD-10: Q53.0–Q53.9                                                                                                                                                           |
| Congenital deformities of hip                                                                                                                                  | ICD-8: 755.0–755.6<br>ICD-10: Q65.0–Q65.9                                                                                                                                                           |
| Congenital deformities of feet                                                                                                                                 | ICD-8: 754.0–754.9<br>ICD-10: Q66.0–Q66.9                                                                                                                                                           |
| Other and unspecified congenital anomalies                                                                                                                     | ICD-8: 740.0–740.9<br>ICD-8: 743.0–745.9<br>ICD-8: 748.0–748.9<br>ICD-8: 757.0–759.9<br>ICD-10: Q00–Q04.9<br>ICD-10: Q06.0–Q07.9<br>ICD-10: Q10–Q18.9<br>ICD-10: Q30.0–Q34.9<br>ICD-10: Q80.0–Q99.9 |
| Other congenital malformations and deformations of the musculoskeletal system                                                                                  | ICD-8: 755.0–755.9<br>ICD-8: 755.0–756.9<br>ICD-8: 756.0–756.9<br>ICD-10: Q67.0–Q79.9                                                                                                               |
| Abdominal and pelvic pain                                                                                                                                      | ICD-8: 785.0–785.5<br>ICD-10: R10.0–R10.9                                                                                                                                                           |
| Senility                                                                                                                                                       | ICD-8: 794.0–794.9<br>ICD-10: R54.0–R54.9                                                                                                                                                           |
| ‘Symptoms, signs and abnormal clinical and laboratory findings not otherwise specified’                                                                        | ICD-10: Rxx                                                                                                                                                                                         |
| ‘Injury, poisoning and certain other consequences of external causes’                                                                                          | ICD-10: DSxx and DTxx                                                                                                                                                                               |
| ‘Observation for or follow-up after treatment for cancer’                                                                                                      | ICD-10: Z031 and DZ08                                                                                                                                                                               |
| ‘Contact with health services due to solid organ or bone marrow transplantation, and other factors influencing health status and contact with health services’ | Remaining codes                                                                                                                                                                                     |

Abbreviations: ICD = International Classification of Diseases; NOMESCO = Nordico Medico-Statistical Committee

<sup>a</sup>Primary diagnoses among patients with secondary herpes zoster diagnosis were categorized according to a list of 203 morbidity groups based on the ICD-8 and ICD-10 World Health Organization morbidity tables. This code list was adapted from a previously published study (Ording AG, Garne JP, Nyström PMW, Cronin-Fenton D, Tarp M, Sørensen HT, *et al.* Hospital recorded morbidity and breast cancer incidence: a nationwide population-based case-control study. PLoS One. 2012;7(10):e47329). Additional codes falling outside this categorization comprised general and unspecific for hospital contact and were grouped by us in four additional categories (‘Symptoms, signs and abnormal clinical and laboratory findings not otherwise specified’, ‘Injury, poisoning and certain other consequences of external causes’, ‘Observation for or follow-up after treatment for cancer’, and ‘Contact with health services due to solid organ or bone marrow transplantation, and other factors influencing health status and contact with health services’).

**Table S2. Reasons for hospital contact among patients with a secondary herpes zoster diagnosis, Denmark, 1994–2012**

| <b>Primary diagnosis<sup>a</sup></b>                                                  | <b>No.</b> | <b>%</b> |
|---------------------------------------------------------------------------------------|------------|----------|
| Other factors influencing health status and contact with health services              | 309        | 8.1%     |
| Symptoms, signs and abnormal clinical and laboratory findings not otherwise specified | 307        | 8.0%     |
| Pneumonia                                                                             | 227        | 5.9%     |
| Bronchitis, emphysema and other obstructive pulmonary diseases                        | 184        | 4.8%     |
| Other endocrine, nutritional and metabolic disorders                                  | 165        | 4.3%     |
| Other viral diseases                                                                  | 151        | 3.9%     |
| Injury, poisoning and certain other consequences of external causes                   | 144        | 3.8%     |
| Other malignant neoplasm of lymphoid, hematopoietic and related tissue                | 135        | 3.5%     |
| Leukemia                                                                              | 115        | 3.0%     |
| Other diseases of the digestive system                                                | 108        | 2.8%     |
| Other disease of the nervous system                                                   | 107        | 2.8%     |
| Other diseases of the skin and subcutaneous tissue                                    | 101        | 2.6%     |
| Septicemia                                                                            | 75         | 2.0%     |
| Other cerebrovascular disease                                                         | 69         | 1.8%     |
| Cystitis                                                                              | 64         | 1.7%     |
| Other bacterial disease                                                               | 63         | 1.6%     |
| Other diseases of the urinary system                                                  | 62         | 1.6%     |
| Conduction disorders and cardiac arrhythmia                                           | 57         | 1.5%     |
| Other inflammatory disease of the eye                                                 | 52         | 1.4%     |
| Diabetes mellitus                                                                     | 52         | 1.4%     |
| Congestive heart failure                                                              | 48         | 1.3%     |
| Angina pectoris                                                                       | 43         | 1.1%     |
| Other diseases of the eye and adnexa                                                  | 43         | 1.1%     |
| Other anemia                                                                          | 43         | 1.1%     |
| Other diseases of the musculoskeletal system and connective tissue                    | 43         | 1.1%     |
| Cervical and other intervertebral disk                                                | 43         | 1.1%     |
| Other disease of the respiratory system                                               | 42         | 1.1%     |
| Other diseases of the ear and mastoid process                                         | 33         | 0.9%     |
| Cerebral infarction                                                                   | 33         | 0.9%     |
| Infections of the skin and subcutaneous and subcutaneous tissue                       | 31         | 0.8%     |
| Essential (primary) hypertension                                                      | 28         | 0.7%     |
| Diarrhea and gastro-enteritis of presumed infectious origin                           | 28         | 0.7%     |
| Soft tissue disorders                                                                 | 28         | 0.7%     |
| Contact with health services due to transplanted organ                                | 27         | 0.7%     |
| Acute myocardial infarction                                                           | 26         | 0.7%     |
| Other infectious and parasitic disease                                                | 23         | 0.6%     |
| Observation for or follow-up after treatment for cancer                               | 22         | 0.6%     |
| Gastric and duodenal ulcer                                                            | 22         | 0.6%     |
| Dementia                                                                              | 20         | 0.5%     |
| Cataract and other disorders of lens                                                  | 20         | 0.5%     |
| Other diseases of liver and gallbladder                                               | 20         | 0.5%     |
| Infections of the skin and subcutaneous and subcutaneous tissue                       | 20         | 0.5%     |
| Osteoarthritis and allied conditions                                                  | 20         | 0.5%     |
| Osteoporosis w/o fracture                                                             | 20         | 0.5%     |
| Malignant neoplasm of trachea, bronchus and lung                                      | 18         | 0.5%     |

|                                                                                    |    |      |
|------------------------------------------------------------------------------------|----|------|
| Other ischemic heart disease                                                       | 17 | 0.4% |
| Other in situ and benign neoplasms and neoplasms of uncertain and unknown behavior | 17 | 0.4% |
| Diseases of appendix                                                               | 17 | 0.4% |
| Malignant neoplasm of breast                                                       | 15 | 0.4% |
| Transient cerebral ischemic attacks and related syndromes                          | 15 | 0.4% |
| Other diseases of the teeth, oral cavity, salivary glands and jaws                 | 15 | 0.4% |
| Inflammatory disease of the central nervous system                                 | 14 | 0.4% |
| Malignant neoplasm of other, ill-defined, secondary and multiple sites             | 14 | 0.4% |
| Infections of kidney                                                               | 13 | 0.3% |
| Gastritis and duodenitis                                                           | 12 | 0.3% |
| Crohn's disease and ulcerative colitis                                             | 12 | 0.3% |
| Glaucoma                                                                           | 11 | 0.3% |
| Phlebitis                                                                          | 11 | 0.3% |
| Malignant neoplasm of prostate                                                     | 11 | 0.3% |
| Other mental and behavioral disorders                                              | 11 | 0.3% |
| Viral encephalitis                                                                 | 11 | 0.3% |
| Urolithiasis/calculus of urinary system                                            | 11 | 0.3% |
| Other complications of pregnancy or delivery                                       | 11 | 0.3% |
| Other diseases of esophagus, stomach and duodenum                                  | 11 | 0.3% |
| Other intestinal infectious disease                                                | 10 | 0.3% |
| Hemorrhagic conditions and other diseases of blood and blood-forming organs        | 10 | 0.3% |
| Malignant neoplasm of brain                                                        | 10 | 0.3% |
| Hodgkin's disease                                                                  | 10 | 0.3% |
| Epilepsy                                                                           | 10 | 0.3% |
| Pulmonary embolism                                                                 | 10 | 0.3% |

<sup>a</sup> Only diagnoses with 10 or more persons recorded are shown.

**Table S3. Characteristics of 13,663 patients with a first-time hospital-based diagnosis of HZ, Denmark, 1994–2012, by diagnosis types**

|                                                  | Type of diagnosis              |       |                                  |       | Type of hospital contact |       |                         |       |                        |       |
|--------------------------------------------------|--------------------------------|-------|----------------------------------|-------|--------------------------|-------|-------------------------|-------|------------------------|-------|
|                                                  | Primary diagnosis<br>(n=9,835) |       | Secondary diagnosis<br>(n=3,828) |       | Inpatient<br>(n=8,228)   |       | Outpatient<br>(n=3,405) |       | Emergency<br>(n=2,030) |       |
|                                                  | No.                            | %     | No.                              | %     | No.                      | %     | No.                     | %     | No.                    | %     |
| <b>Type of hospital contact</b>                  |                                |       |                                  |       |                          |       |                         |       |                        |       |
| Outpatient                                       | 2,874                          | 29.2% | 531                              | 13.9% | –                        | –     | –                       | –     | –                      | –     |
| Inpatient                                        | 5,049                          | 51.3% | 3,179                            | 83.0% | –                        | –     | –                       | –     | –                      | –     |
| Emergency                                        | 1,912                          | 19.4% | 118                              | 3.1%  | –                        | –     | –                       | –     | –                      | –     |
| <b>Type of diagnosis</b>                         |                                |       |                                  |       |                          |       |                         |       |                        |       |
| Primary                                          | –                              | –     | –                                | –     | 5,049                    | 61.4% | 2,874                   | 84.4% | 1,912                  | 94.2% |
| Secondary                                        | –                              | –     | –                                | –     | 3,179                    | 38.6% | 531                     | 15.6% | 118                    | 5.8%  |
| <b>Diagnosis code (ICD-10 code)</b>              |                                |       |                                  |       |                          |       |                         |       |                        |       |
| HZ meningo-encephalitis (B02.0–1)                | 264                            | 2.7%  | 73                               | 1.9%  | 290                      | 3.5%  | 42                      | 1.2%  | 5                      | 0.2%  |
| HZ encephalitis (B02.0)                          | 199                            | 2.0%  | 64                               | 1.7%  | 222                      | 2.7%  | 36                      | 1.1%  | 5                      | 0.2%  |
| HZ meningitis (B02.1)                            | 65                             | 0.7%  | 9                                | 0.2%  | 68                       | 0.8%  | 6                       | 0.2%  | 0                      | 0.0%  |
| HZ with other nervous system involvement (B02.2) | 822                            | 8.4%  | 239                              | 6.2%  | 631                      | 7.7%  | 322                     | 9.5%  | 108                    | 5.3%  |
| HZ ophthalmicus (B02.3)                          | 1,449                          | 14.7% | 253                              | 6.6%  | 462                      | 5.6%  | 951                     | 27.9% | 289                    | 14.2% |
| Disseminated HZ (B02.7)                          | 200                            | 2.0%  | 73                               | 1.9%  | 213                      | 2.6%  | 42                      | 1.2%  | 18                     | 0.9%  |
| HZ with other complication (B02.8)               | 480                            | 4.9%  | 179                              | 4.7%  | 375                      | 4.6%  | 204                     | 6.0%  | 80                     | 3.9%  |
| HZ without complication (B02.9)                  | 6,620                          | 67.3% | 3,011                            | 78.7% | 6,257                    | 76.0% | 1,844                   | 54.2% | 1,530                  | 75.4% |
| <b>Age (years)</b>                               |                                |       |                                  |       |                          |       |                         |       |                        |       |
| 0–9                                              | 393                            | 4.0%  | 99                               | 2.6%  | 306                      | 3.7%  | 126                     | 3.7%  | 60                     | 3.0%  |
| 10–19                                            | 294                            | 3.0%  | 74                               | 1.9%  | 202                      | 2.5%  | 111                     | 3.3%  | 55                     | 2.7%  |
| 20–29                                            | 525                            | 5.3%  | 98                               | 2.6%  | 251                      | 3.1%  | 176                     | 5.2%  | 196                    | 9.7%  |
| 30–39                                            | 602                            | 6.1%  | 170                              | 4.4%  | 305                      | 3.7%  | 264                     | 7.8%  | 203                    | 10.0% |
| 40–49                                            | 696                            | 7.1%  | 189                              | 4.9%  | 404                      | 4.9%  | 295                     | 8.7%  | 186                    | 9.2%  |
| 50–59                                            | 1,297                          | 13.2% | 353                              | 9.2%  | 775                      | 9.4%  | 520                     | 15.3% | 355                    | 17.5% |
| 60–69                                            | 1,712                          | 17.4% | 645                              | 16.8% | 1,361                    | 16.5% | 636                     | 18.7% | 360                    | 17.7% |
| 70–79                                            | 2,109                          | 21.4% | 985                              | 25.7% | 2,092                    | 25.4% | 660                     | 19.4% | 342                    | 16.8% |
| 80–89                                            | 1,862                          | 18.9% | 997                              | 26.0% | 2,089                    | 25.4% | 541                     | 15.9% | 229                    | 11.3% |
| ≥90                                              | 345                            | 3.5%  | 218                              | 5.7%  | 443                      | 5.4%  | 76                      | 2.2%  | 44                     | 2.2%  |
| <b>Sex</b>                                       |                                |       |                                  |       |                          |       |                         |       |                        |       |
| Women                                            | 5,614                          | 57.1% | 2,209                            | 57.7% | 4,812                    | 58.5% | 1,940                   | 57.0% | 1,071                  | 52.8% |
| Men                                              | 4,221                          | 42.9% | 1,619                            | 42.3% | 3,416                    | 41.5% | 1,465                   | 43.0% | 959                    | 47.2% |
| <b>Any of the comorbidities identified</b>       |                                |       |                                  |       |                          |       |                         |       |                        |       |
|                                                  | 5,306                          | 54.0% | 2,761                            | 72.1% | 5,637                    | 68.5% | 1,637                   | 48.1% | 793                    | 39.1% |
| <b>Charlson Comorbidity Index level</b>          |                                |       |                                  |       |                          |       |                         |       |                        |       |
| None                                             | 4,832                          | 49.1% | 1,226                            | 32.0% | 2,849                    | 34.6% | 1,919                   | 56.4% | 1,290                  | 63.5% |
| Moderate                                         | 1,647                          | 16.7% | 717                              | 18.7% | 1,515                    | 18.4% | 538                     | 15.8% | 311                    | 15.3% |
| Severe                                           | 1,552                          | 15.8% | 822                              | 21.5% | 1,727                    | 21.0% | 439                     | 12.9% | 208                    | 10.2% |
| Very Severe                                      | 1,804                          | 18.3% | 1,063                            | 27.8% | 2,137                    | 26.0% | 509                     | 14.9% | 221                    | 10.9% |

|                                                        |       |       |     |       |       |       |     |       |     |       |
|--------------------------------------------------------|-------|-------|-----|-------|-------|-------|-----|-------|-----|-------|
| Myocardial infarction                                  | 601   | 6.1%  | 320 | 8.4%  | 656   | 8.0%  | 171 | 5.0%  | 94  | 4.6%  |
| Congestive heart failure                               | 626   | 6.4%  | 424 | 11.1% | 804   | 9.8%  | 166 | 4.9%  | 80  | 3.9%  |
| Peripheral vascular disease                            | 529   | 5.4%  | 274 | 7.2%  | 573   | 7.0%  | 164 | 4.8%  | 66  | 3.3%  |
| Cerebrovascular disease                                | 910   | 9.3%  | 536 | 14.0% | 1,045 | 12.7% | 272 | 8.0%  | 129 | 6.4%  |
| Dementia                                               | 156   | 1.6%  | 100 | 2.6%  | 180   | 2.2%  | 40  | 1.2%  | 36  | 1.8%  |
| Chronic pulmonary disease                              | 1,196 | 12.2% | 715 | 18.7% | 1,351 | 16.4% | 356 | 10.5% | 204 | 10.0% |
| Connective tissue disease                              | 681   | 6.9%  | 302 | 7.9%  | 695   | 8.4%  | 206 | 6.0%  | 82  | 4.0%  |
| Ulcer disease                                          | 545   | 5.5%  | 303 | 7.9%  | 602   | 7.3%  | 161 | 4.7%  | 85  | 4.2%  |
| Mild liver disease                                     | 108   | 1.1%  | 63  | 1.6%  | 88    | 1.1%  | 58  | 1.7%  | 25  | 1.2%  |
| Diabetes without end organ damage                      | 598   | 6.1%  | 320 | 8.4%  | 655   | 8.0%  | 177 | 5.2%  | 86  | 4.2%  |
| Hemiplegia                                             | 39    | 0.4%  | 18  | 0.5%  | 42    | 0.5%  | 12  | 0.4%  | 3   | 0.1%  |
| Moderate to severe renal disease                       | 439   | 4.5%  | 204 | 5.3%  | 461   | 5.6%  | 140 | 4.1%  | 42  | 2.1%  |
| Diabetes with end organ damage                         | 268   | 2.7%  | 151 | 3.9%  | 312   | 3.8%  | 77  | 2.3%  | 30  | 1.5%  |
| Non-metastatic solid tumor                             | 1,156 | 11.8% | 599 | 15.6% | 1,199 | 14.6% | 386 | 11.3% | 170 | 8.4%  |
| Leukemia                                               | 309   | 3.1%  | 180 | 4.7%  | 429   | 5.2%  | 41  | 1.2%  | 19  | 0.9%  |
| Lymphoma                                               | 550   | 5.6%  | 284 | 7.4%  | 715   | 8.7%  | 85  | 2.5%  | 34  | 1.7%  |
| Moderate to severe liver disease                       | 37    | 0.4%  | 25  | 0.7%  | 40    | 0.5%  | 17  | 0.5%  | 5   | 0.2%  |
| Metastatic solid tumor                                 | 204   | 2.1%  | 127 | 3.3%  | 236   | 2.9%  | 69  | 2.0%  | 26  | 1.3%  |
| Acquired immune deficiency syndrome                    | 70    | 0.7%  | 83  | 2.2%  | 113   | 1.4%  | 22  | 0.6%  | 18  | 0.9%  |
| <b>Comorbidities associated with immunosuppression</b> |       |       |     |       |       |       |     |       |     |       |
| Stem cell or bone marrow transplantation               | 207   | 2.1%  | 66  | 1.7%  | 245   | 3.0%  | 19  | 0.6%  | 9   | 0.4%  |
| Solid organ transplantation                            | 113   | 1.1%  | 39  | 1.0%  | 117   | 1.4%  | 27  | 0.8%  | 8   | 0.4%  |
| Human immunodeficiency virus infection                 | 94    | 1.0%  | 116 | 3.0%  | 162   | 2.0%  | 29  | 0.9%  | 19  | 0.9%  |
| Primary immunodeficiency                               | 41    | 0.4%  | 20  | 0.5%  | 48    | 0.6%  | 10  | 0.3%  | 3   | 0.1%  |
| Any cancer                                             | 1,851 | 18.8% | 970 | 25.3% | 2,128 | 25.9% | 483 | 14.2% | 210 | 10.3% |
| Any autoimmune disease                                 | 1,524 | 15.5% | 769 | 20.1% | 1,557 | 18.9% | 532 | 15.6% | 204 | 10.0% |
| Hematological                                          | 46    | 0.5%  | 27  | 0.7%  | 59    | 0.7%  | 12  | 0.4%  | 2   | 0.1%  |
| Endocrine                                              | 404   | 4.1%  | 210 | 5.5%  | 436   | 5.3%  | 127 | 3.7%  | 51  | 2.5%  |
| Central nervous system                                 | 44    | 0.4%  | 23  | 0.6%  | 43    | 0.5%  | 18  | 0.5%  | 6   | 0.3%  |
| Gastrointestinal                                       | 189   | 1.9%  | 85  | 2.2%  | 172   | 2.1%  | 67  | 2.0%  | 35  | 1.7%  |
| Skin                                                   | 202   | 2.1%  | 113 | 3.0%  | 182   | 2.2%  | 94  | 2.8%  | 39  | 1.9%  |
| Connective tissue disease                              | 733   | 7.5%  | 347 | 9.1%  | 771   | 9.4%  | 229 | 6.7%  | 80  | 3.9%  |
| Pulmonary                                              | 23    | 0.2%  | 8   | 0.2%  | 24    | 0.3%  | 7   | 0.2%  | 0   | 0.0%  |
| Ocular                                                 | 60    | 0.6%  | 34  | 0.9%  | 40    | 0.5%  | 49  | 1.4%  | 5   | 0.2%  |

Abbreviations: HZ, herpes zoster

**Table S4. SMRs among patients with a first-time hospital-based diagnosis of HZ, Denmark, 1994–2012, by diagnosis types**

|                                                  | <b>Observed</b> | <b>Expected</b> | <b>SMR (95% CI)<sup>a</sup></b> |
|--------------------------------------------------|-----------------|-----------------|---------------------------------|
| <b>Overall</b>                                   | 6,059           | 3,414           | 1.8 (1.7–1.8)                   |
| <b>Type of hospital contact</b>                  |                 |                 |                                 |
| Emergency room                                   | 562             | 447             | 1.3 (1.2–1.4)                   |
| Outpatient clinic                                | 1,090           | 753             | 1.4 (1.4–1.5)                   |
| Inpatient                                        | 4,407           | 2,214           | 2.0 (1.9–2.1)                   |
| <b>Type of diagnosis</b>                         |                 |                 |                                 |
| Primary diagnosis                                | 3,854           | 2,493           | 1.5 (1.5–1.6)                   |
| Secondary diagnosis                              | 2,205           | 920             | 2.4 (2.3–2.5)                   |
| <b>Severity of HZ</b>                            |                 |                 |                                 |
| Uncomplicated                                    | 4,429           | 2,382           | 1.9 (1.8–1.9)                   |
| Complicated                                      | 1,630           | 1,031           | 1.6 (1.5–1.7)                   |
| <b>Extent of HZ</b>                              |                 |                 |                                 |
| Localized                                        | 5,051           | 2,846           | 1.8 (1.7–1.8)                   |
| Disseminated                                     | 1,008           | 568             | 1.8 (1.7–1.9)                   |
| <b>Diagnosis code (ICD-10 code)</b>              |                 |                 |                                 |
| HZ meningo-encephalitis (B02.0–1)                | 112             | 60              | 1.8 (1.5–2.2)                   |
| HZ encephalitis (B02.0)                          | 103             | 54              | 1.9 (1.6–2.3)                   |
| HZ meningitis (B02.1)                            | 9               | 6.4             | 1.4 (0.7–2.7)                   |
| HZ with other nervous system involvement (B02.2) | 454             | 298             | 1.5 (1.4–1.7)                   |
| HZ ophthalmicus (B02.3)                          | 622             | 464             | 1.3 (1.2–1.5)                   |
| Disseminated HZ (B02.7)                          | 150             | 40              | 3.7 (3.2–4.4)                   |
| HZ with other complication (B02.8)               | 292             | 170             | 1.7 (1.5–1.9)                   |
| HZ without complication (B02.9)                  | 4,429           | 2,382           | 1.9 (1.8–1.9)                   |

Abbreviations: CI, confidence interval; HZ, herpes zoster; SMR, Standardized mortality ratios

<sup>a</sup> Computed using indirect standardization with the Danish general population as reference.

Figure S1. Rate of first-time hospital-based diagnoses of herpes zoster among men and women, Denmark, 1994–2012, directly standardized to the age-distribution in the 2000 Danish Census

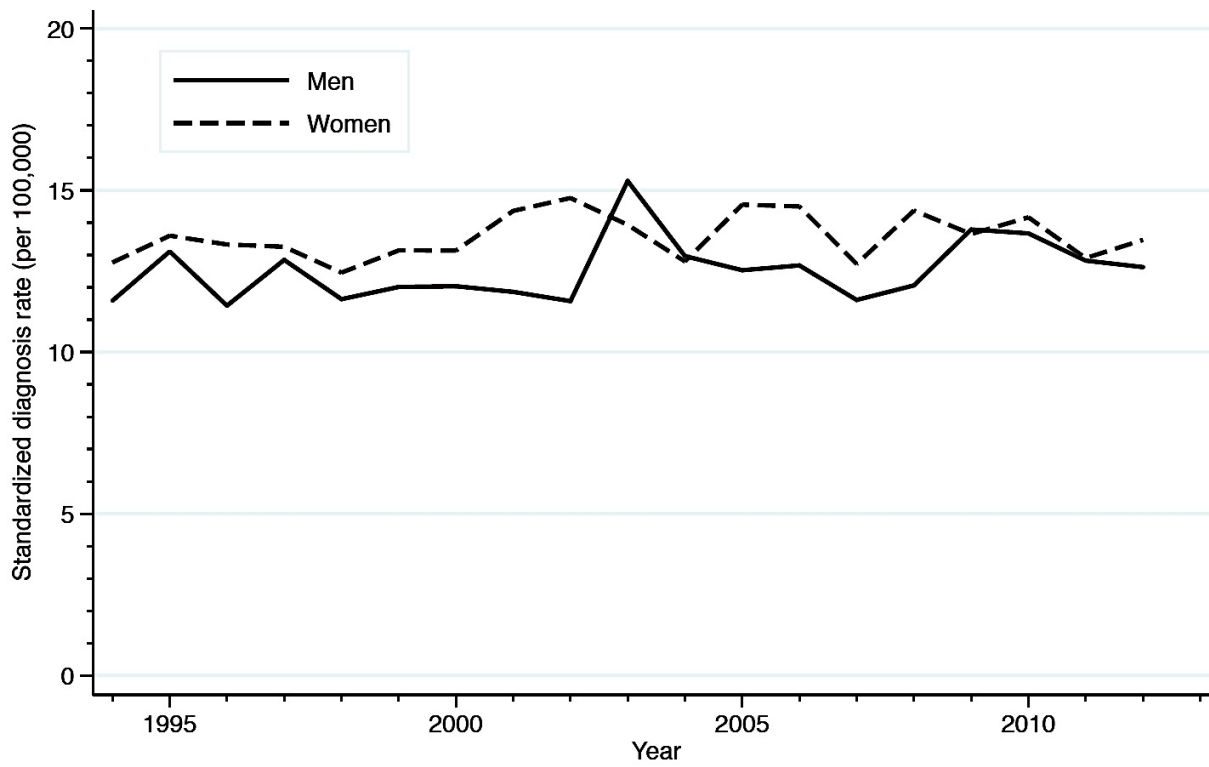



Figure S2. Age-specific rates of first-time hospital-based diagnoses of herpes zoster, Denmark, 1994–2012

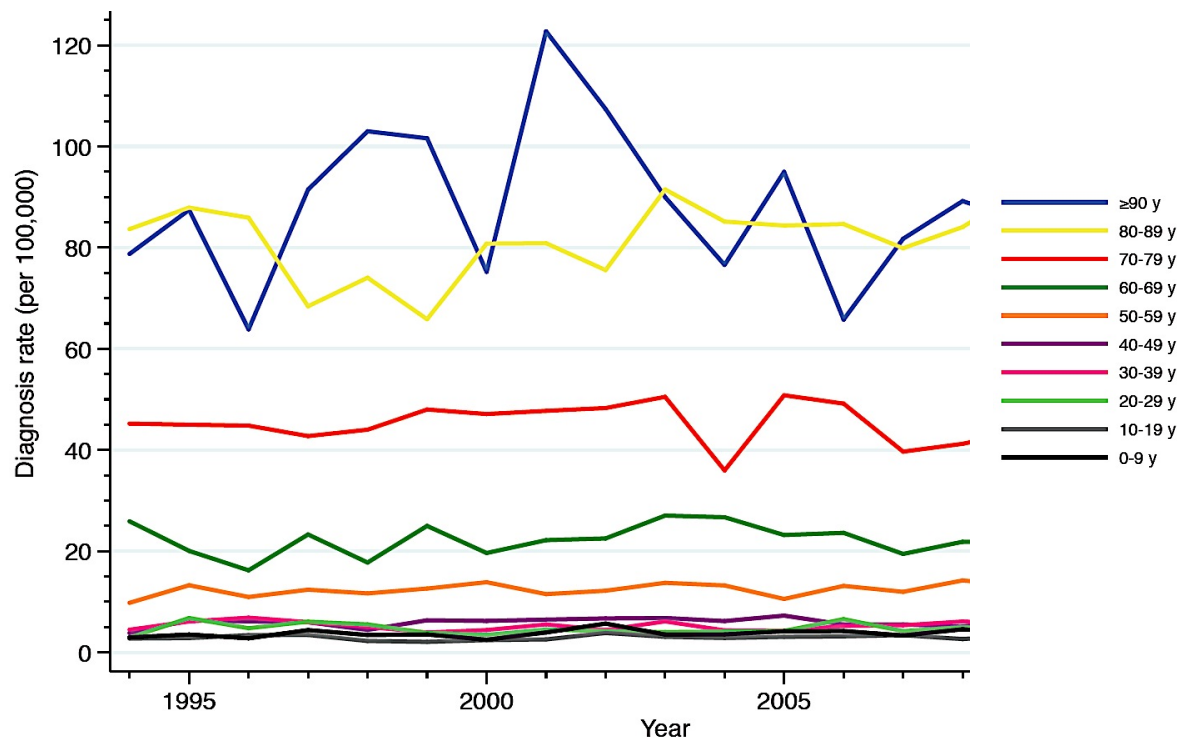

**Figure S3. Age-specific diagnosis rates of herpes zoster reported for European countries**

**a) Primary inpatient diagnoses of herpes zoster**

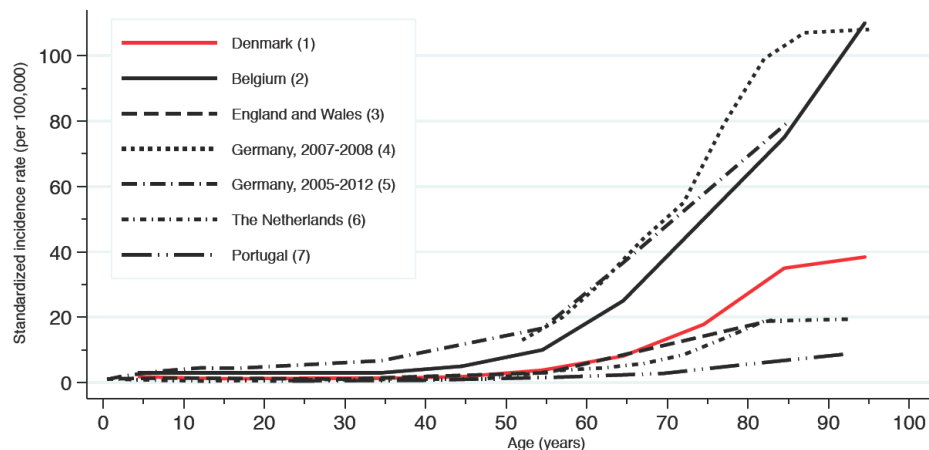

**b) Primary and secondary inpatient diagnoses of herpes zoster**

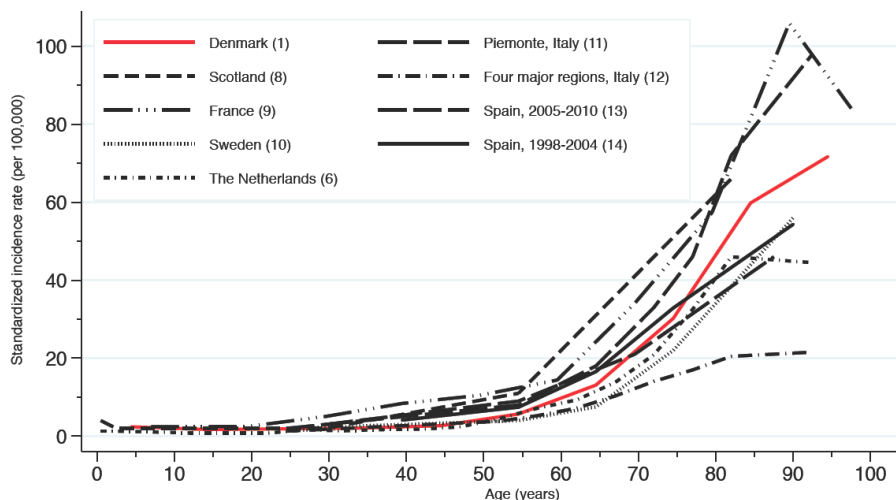

- (1) Present study
- (2) Bilcke J, Ogunjimi B, Marais C, de Smet F, Callens M, Callaert K, et al. The health and economic burden of chickenpox and herpes zoster in Belgium. *Epidemiol Infect.* 2012;140(11):2096–109.
- (3) Brisson M, Edmunds WJ. Epidemiology of Varicella-Zoster Virus in England and Wales. *J Med Virol.* 2003;70 Suppl 1:S9–14.
- (4) Ultsch B, Siedler A, Rieck T, Reinhold T, Krause G, Wichmann O. Herpes zoster in Germany: quantifying the burden of disease. *BMC Infect Dis.* 2011;11:173.
- (5) Siedler A, Dettmann M. Hospitalization with varicella and shingles before and after introduction of childhood varicella vaccination in Germany. *Hum Vaccin Immunother.* 2014;10(12):3594–600.
- (6) de Melker H, Berbers G, Hahné S, Rümke H, van den Hof S, de Wit A, et al. The epidemiology of varicella and herpes zoster in The Netherlands: implications for varicella zoster virus vaccination. *Vaccine.* 2006;24(18):3946–52.
- (7) Mesquita M, Froes F. Hospital admissions for herpes zoster in Portugal between 2000 and 2010. *Acta Med Port.* 2013 Sep;26(5):531–6.
- (8) Scott FT, Johnson RW, Leedham-Green M, Davies E, Edmunds WJ, Breuer J. The burden of Herpes Zoster: a prospective population based study. *Vaccine.* 2006 Feb 27;24(9):1308–14.
- (9) Gonzalez Chiappe S, Sarazin M, Turbelin C, Lasserre A, Pelat C, Bonmarin I, et al. Herpes zoster: Burden of disease in France. *Vaccine.* 2010 Nov 23;28(50):7933–8.
- (10) Studahl M, Petzold M, Cassel T. Disease burden of herpes zoster in Sweden—predominance in the elderly and in women - a register based study. *BMC Infect Dis.* 2013;13:586.
- (11) Di Legami V, Gianino MM, Ciofi degli Atti M, Massari M, Migliardi A, Tomba GS, et al. Epidemiology and costs of herpes zoster: background data to estimate the impact of vaccination. *Vaccine.* 2007 Oct 23;25(43):7598–604.
- (12) Gialloreti LE, Merito M, Pezzotti P, Naldi L, Gatti A, Beillat M, et al. Epidemiology and economic burden of herpes zoster and post-herpetic neuralgia in Italy: a retrospective, population-based study. *BMC Infect Dis.* 2010;10:230.
- (13) Gil-Prieto R, Walter S, Gonzalez-Escalada A, Garcia-Garcia L, Marín-García P, Gil-de-Miguel A. Different vaccination strategies in Spain and its impact on severe varicella and zoster. *Vaccine.* 2014 Jan 3;32(2):277–83.
- (14) Gil A, Gil R, Alvaro A, San Martín M, González A. Burden of herpes zoster requiring hospitalization in Spain during a seven-year period (1998-2004). *BMC Infect Dis.* 2009;9:55.
